# Supplementary material for: AIE-active miktoarm star polymer nanoassemblies: structure-dependent self-assembly and photoluminescence behavior
Source: Royal Society of Chemistry journal article supplement (doi:10.1039/d5py01012h), 2025-12-12

Electronic Supporting Information for:

**AIE-Active Miktoarm Star Polymer Nanoassemblies: Structure-  
Dependent Self-assembly and Photoluminescence Behavior**

Xuehui Liu,<sup>a</sup> Qian Li,<sup>a</sup> Ranran Gao,<sup>a</sup> Qu Wang,<sup>a</sup> Li Wang,<sup>\*a</sup> and Wantai Yang<sup>\*abc</sup>

<sup>a</sup>. State Key Laboratory of Chemical Resource Engineering, Beijing University of Chemical Technology, Beijing 100029, China.

<sup>b</sup>. Beijing Engineering Research Center for the Syntheses and Applications of Waterborne Polymers, College of Materials Science and Engineering, Beijing University of Chemical Technology, Beijing 100029, China.

<sup>c</sup>. Beijing Advanced Innovation Centre for Soft Matter Science and Engineering, Beijing 100029, China.

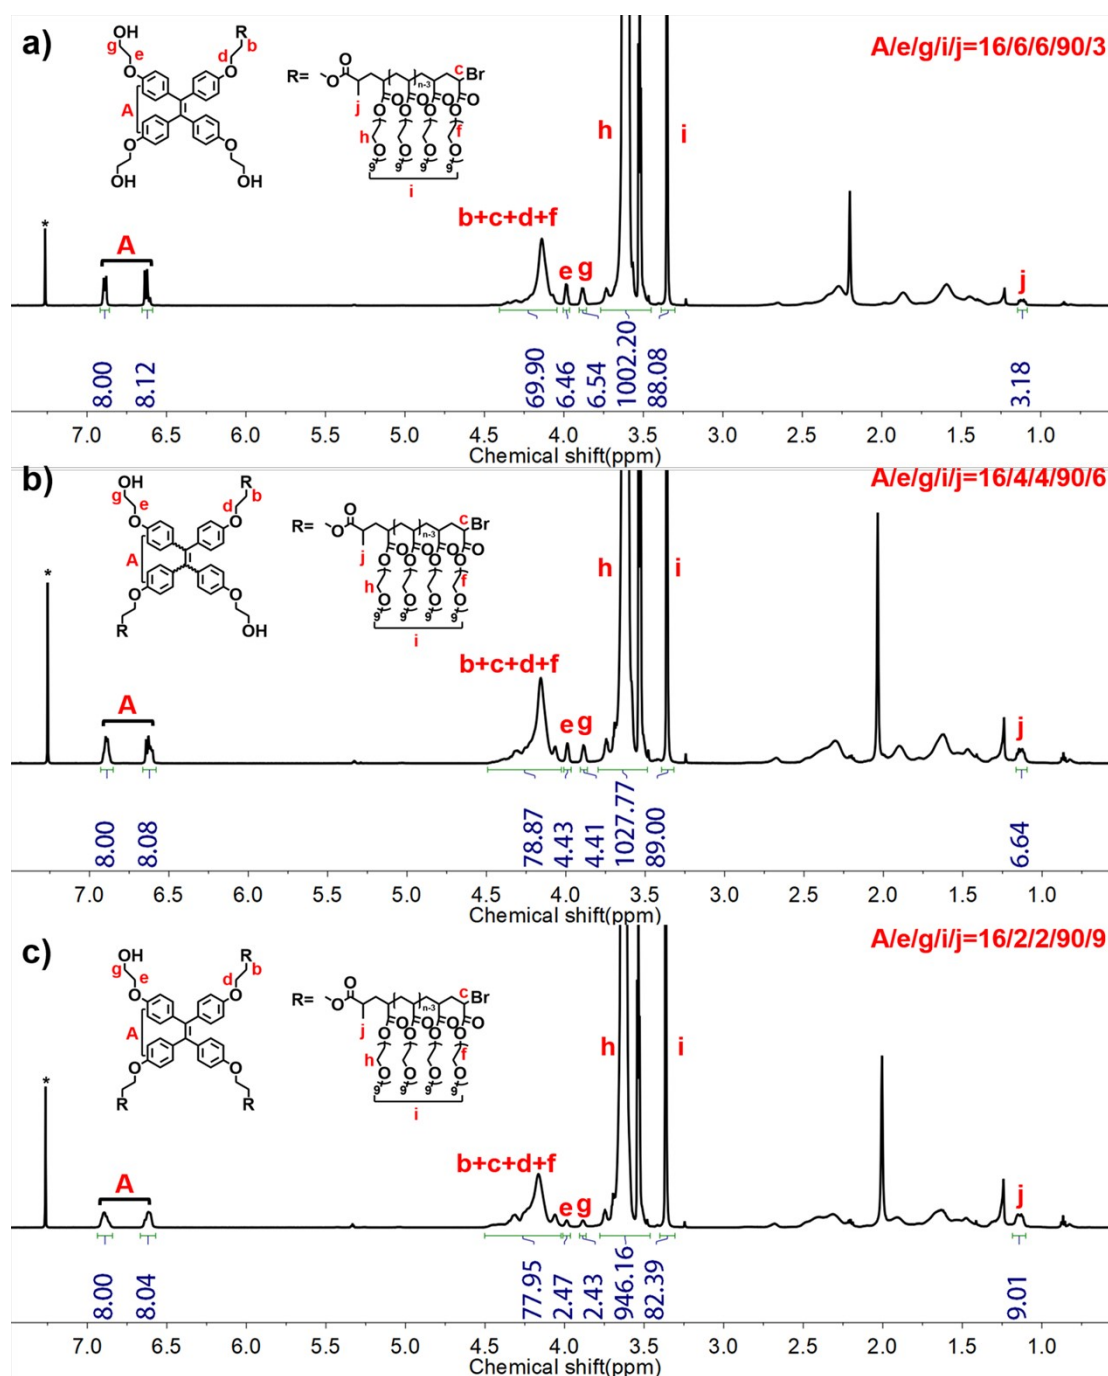

**Fig. S1**  $^1\text{H}$  NMR spectra of (a) TPE-POEGA<sub>29</sub>-3OH, (b) TPE-(POEGA<sub>15</sub>)<sub>2</sub>-2OH, and (c) TPE-(POEGA<sub>9</sub>)<sub>3</sub>-1OH in  $\text{CDCl}_3$ .  $^1\text{H}$  NMR resonances from residual solvent in  $\text{CDCl}_3$  are indicated by an asterisk (\*). The ratios on the top right are theoretical values obtained assuming 100% conversion of OEGA and initiation efficiency  $f = 1$ .

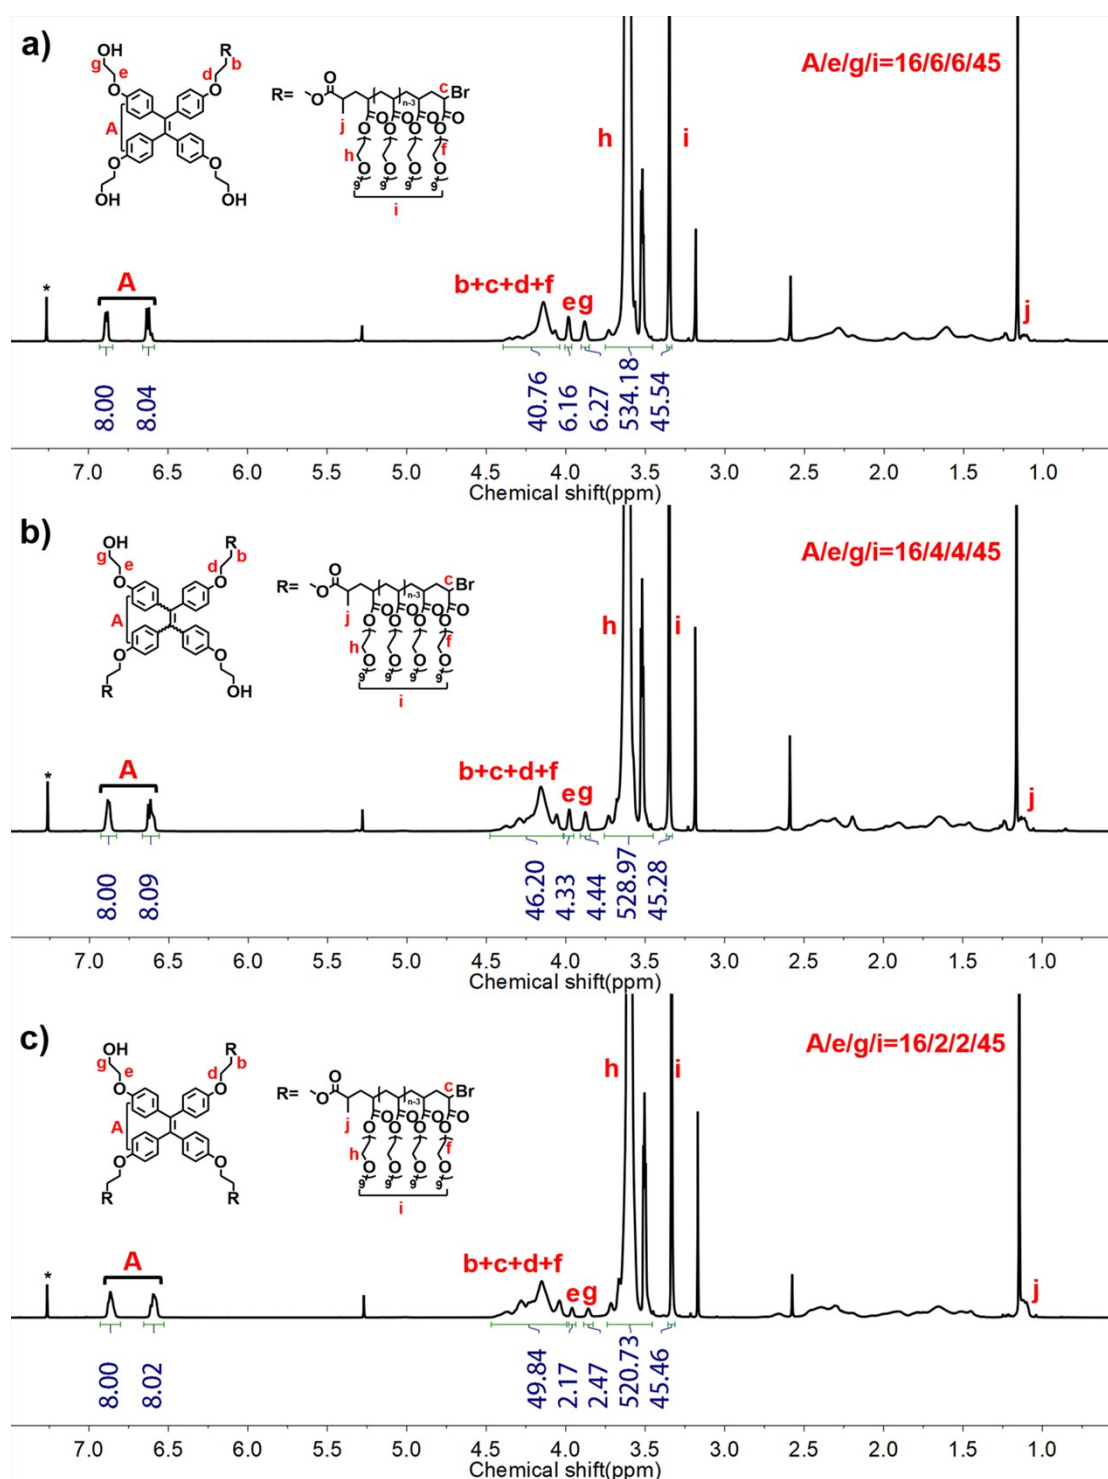

**Fig. S2**  $^1\text{H}$  NMR spectra of (a) TPE-POEGA<sub>15</sub>-3OH, (b) TPE-(POEGA<sub>7.5</sub>)<sub>2</sub>-2OH, and (c) TPE-(POEGA<sub>5</sub>)<sub>3</sub>-1OH in CDCl<sub>3</sub>.  $^1\text{H}$  NMR resonances from residual solvent in CDCl<sub>3</sub> are indicated by an asterisk (\*). The ratios on the top right are theoretical values obtained assuming 100% conversion of OEGA and initiation efficiency  $f = 1$ .

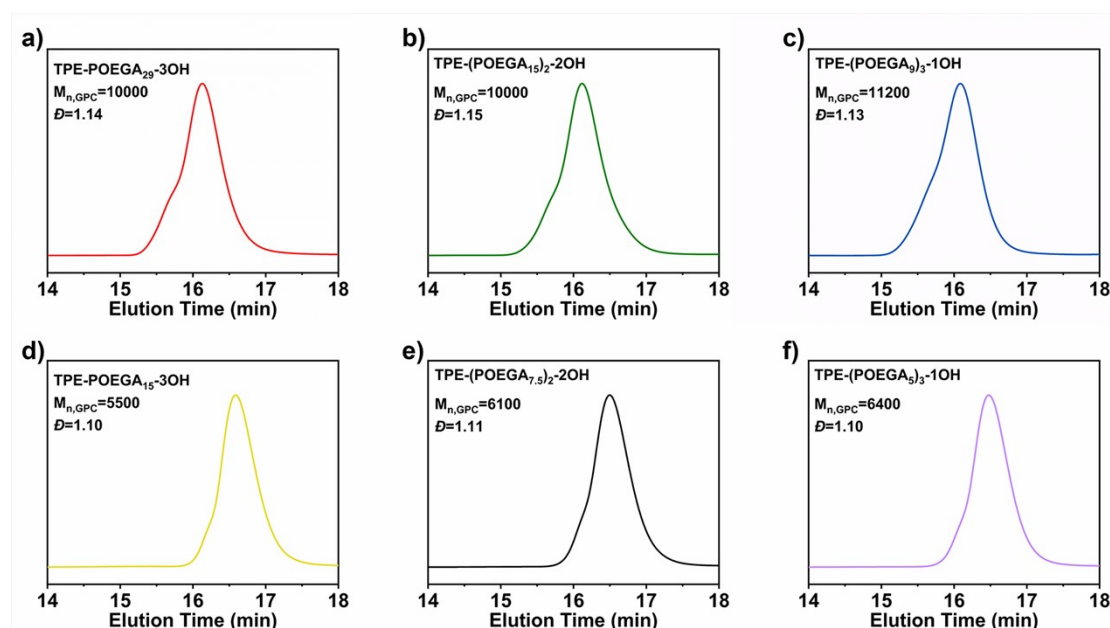

**Fig. S3** GPC traces of (a) TPE-POEGA<sub>29</sub>-3OH, (b) TPE-(POEGA<sub>15</sub>)<sub>2</sub>-2OH, (c) TPE-(POEGA<sub>9</sub>)<sub>3</sub>-1OH, (d) TPE-POEGA<sub>15</sub>-3OH, (e) TPE-(POEGA<sub>7.5</sub>)<sub>2</sub>-2OH, and (f) TPE-(POEGA<sub>5</sub>)<sub>3</sub>-1OH.

**Table S1** Characterization results of TPE-(POEGA)<sub>n</sub>-(4-n)CDPA (n = 1–3)

|                                                 | DP <sup>a</sup> | M <sub>n,NMR</sub> (g/mol) <sup>b</sup> | M <sub>n,GPC</sub> (g/mol) <sup>c</sup> | Đ    |
|-------------------------------------------------|-----------------|-----------------------------------------|-----------------------------------------|------|
| TPE-POEGA <sub>29</sub> -3CDPA                  | 29              | 15800                                   | 13700                                   | 1.14 |
| TPE-(POEGA <sub>15</sub> ) <sub>2</sub> -2CDPA  | 30              | 16000                                   | 12900                                   | 1.15 |
| TPE-(POEGA <sub>9</sub> ) <sub>3</sub> -1CDPA   | 27              | 14300                                   | 12900                                   | 1.15 |
| TPE-POEGA <sub>15</sub> -3CDPA                  | 15              | 9070                                    | 5900                                    | 1.10 |
| TPE-(POEGA <sub>7.5</sub> ) <sub>2</sub> -2CDPA | 15              | 8810                                    | 6000                                    | 1.10 |
| TPE-(POEGA <sub>5</sub> ) <sub>3</sub> -1CDPA   | 15              | 8570                                    | 6200                                    | 1.10 |

<sup>a</sup> Theoretical DP of POEGA; <sup>b</sup> M<sub>n</sub> calculated by <sup>1</sup>H NMR; <sup>c</sup> M<sub>n</sub> measured by GPC.

Polymerization conditions: [TPE-(POEGA)<sub>n</sub>-(4-n)OH]/[CDPA]/[DCC]/[DMAP] = 1/3/3/0.3, 40 °C, 48 h.

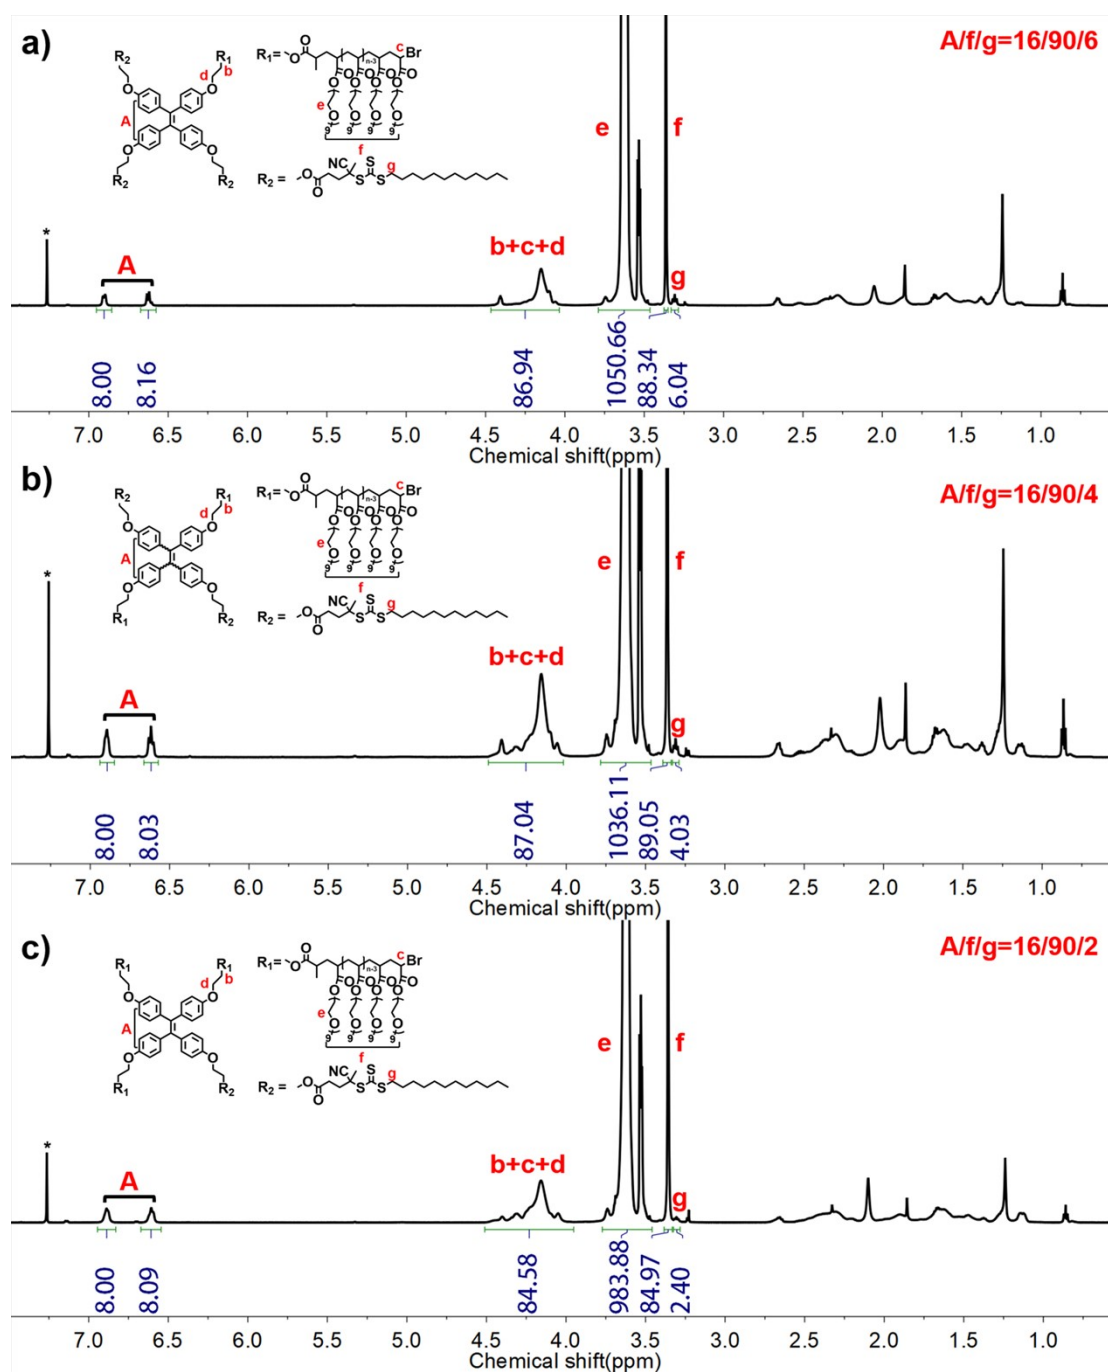

**Fig. S4**  $^1\text{H}$  NMR spectra of (a) TPE-POEGA<sub>29</sub>-3CDPA, (b) TPE-(POEGA<sub>15</sub>)<sub>2</sub>-2CDPA, and (c) TPE-(POEGA<sub>9</sub>)<sub>3</sub>-1CDPA in  $\text{CDCl}_3$ .  $^1\text{H}$  NMR resonances from residual solvent in  $\text{CDCl}_3$  are indicated by an asterisk (\*).

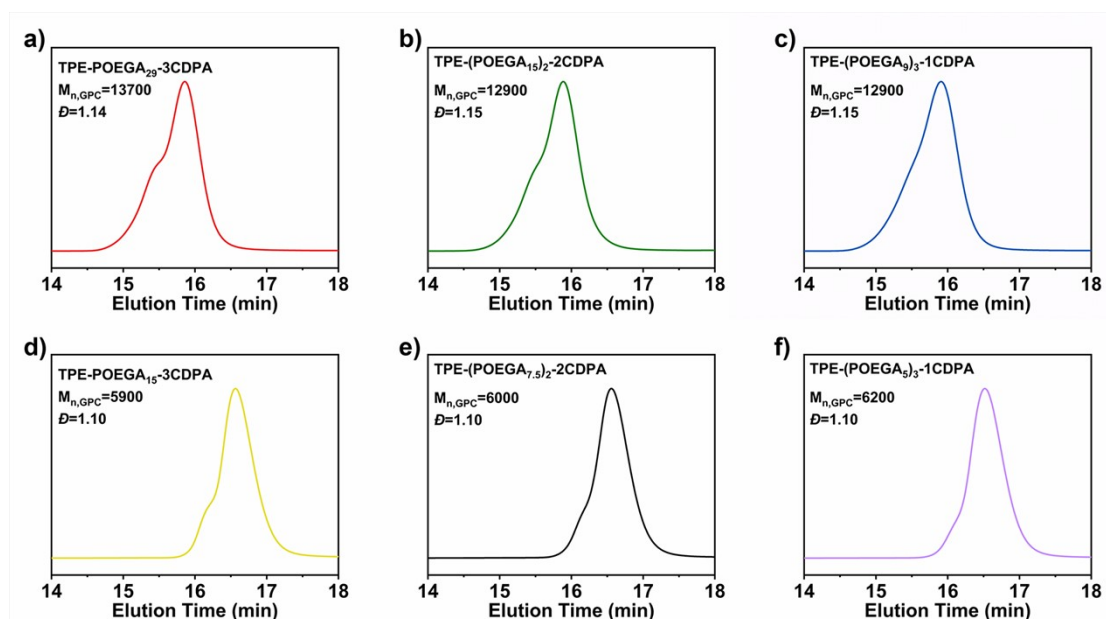

**Fig. S5** GPC traces of (a) TPE-POEGA<sub>29</sub>-3CDPA, (b) TPE-(POEGA<sub>15</sub>)<sub>2</sub>-2CDPA, (c) TPE-(POEGA<sub>9</sub>)<sub>3</sub>-1CDPA, (d) TPE-POEGA<sub>15</sub>-3CDPA, (e) TPE-(POEGA<sub>7.5</sub>)<sub>2</sub>-2CDPA, and (f) TPE-(POEGA<sub>5</sub>)<sub>3</sub>-1CDPA.

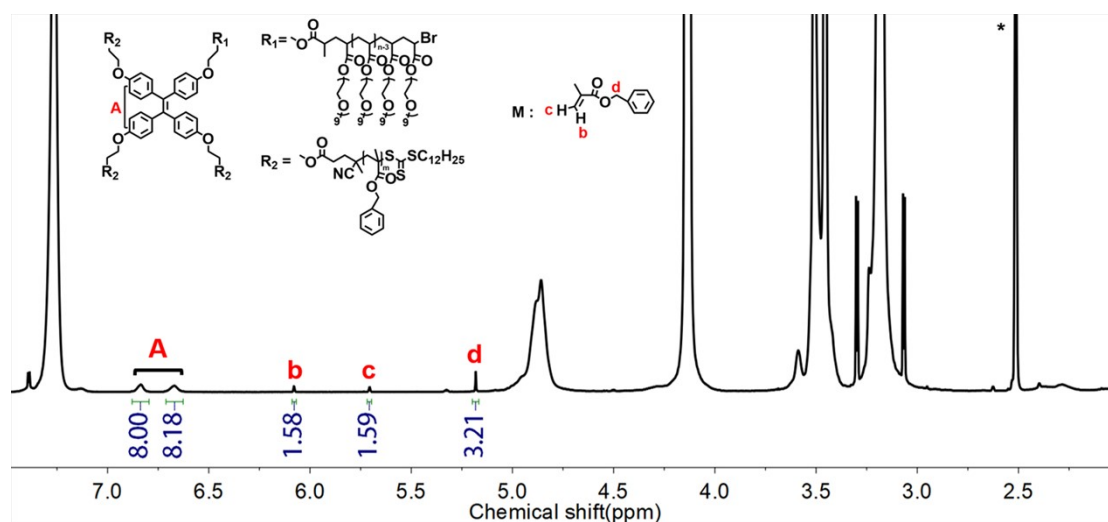

**Fig. S6**  $^1\text{H}$  NMR spectra for TPE-POEGA<sub>15</sub>-3CDPA mediated RAFT dispersion polymerization of BzMA.  $^1\text{H}$  NMR resonances from residual solvent in DMSO- $d_6$  are indicated by an asterisk (\*).

$$\text{Conversion}\% = \frac{DP_{\text{design}} - S_b}{DP_{\text{design}}}$$

**Equation S1.** Calculation of conversion by  $^1\text{H}$  NMR.

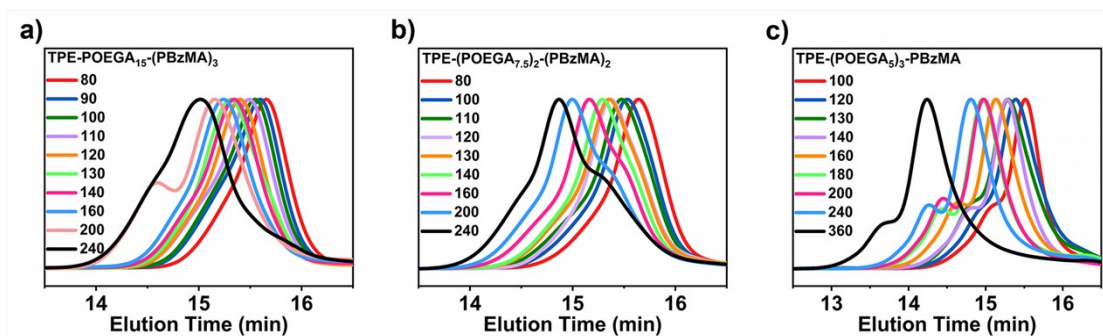

**Fig. S7** GPC traces of TPE-(POEGA)<sub>*n*</sub>-(PBzMA)<sub>4-*n*</sub>.



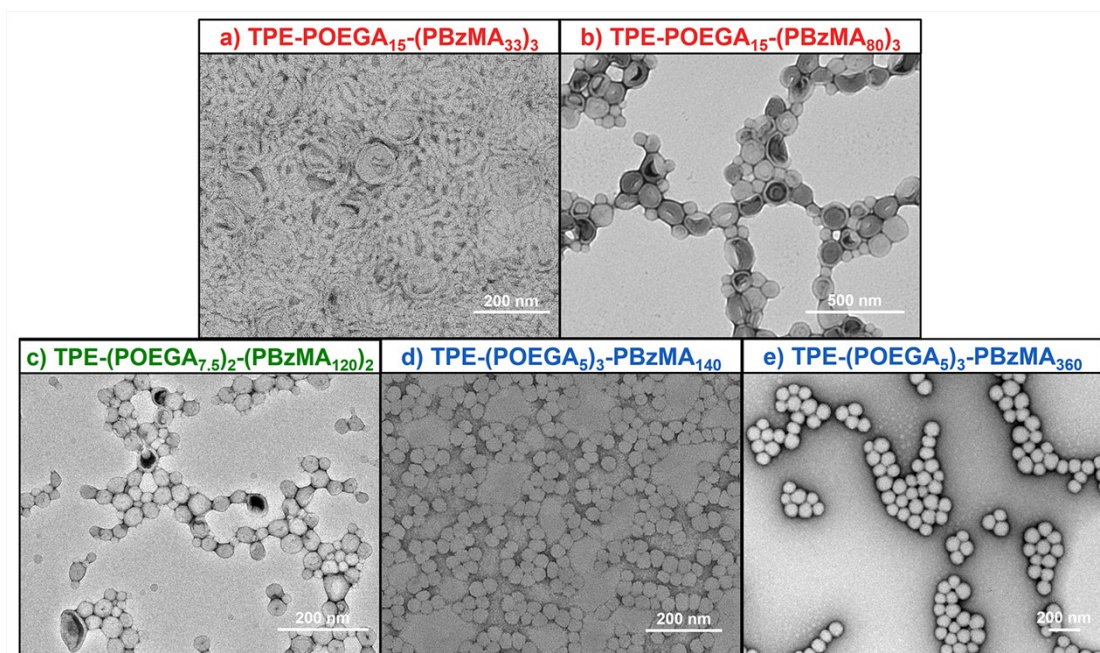

**Fig. S8** TEM micrographs of (a, b) TPE-POEGA<sub>15</sub>-(PBzMA)<sub>3</sub>, (c) TPE-(POEGA<sub>7.5</sub>)<sub>2</sub>-(PBzMA)<sub>2</sub>, and (d, e) TPE-(POEGA<sub>5</sub>)<sub>3</sub>-PBzMA nanoassemblies with different DP of PBzMA.

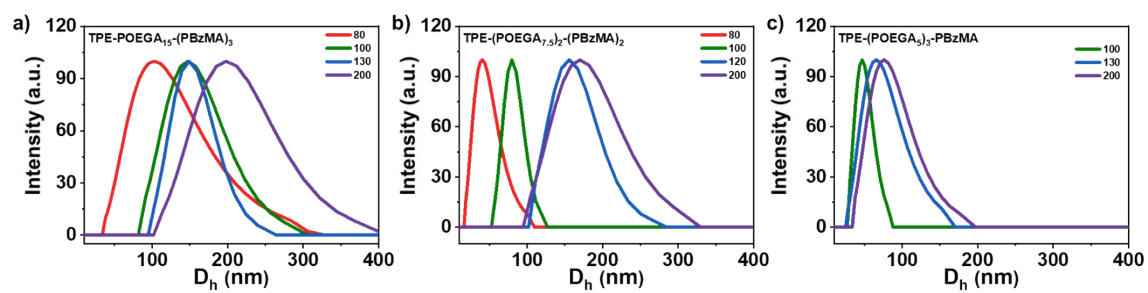

**Fig. S9** Representative DLS traces of (a) TPE-POEGA<sub>15</sub>-(PBzMA)<sub>3</sub>, (b) TPE-(POEGA<sub>7.5</sub>)<sub>2</sub>-(PBzMA)<sub>2</sub>, and (c) TPE-(POEGA<sub>5</sub>)<sub>3</sub>-PBzMA nanoassemblies with different  $DP_{PBzMA}$ .

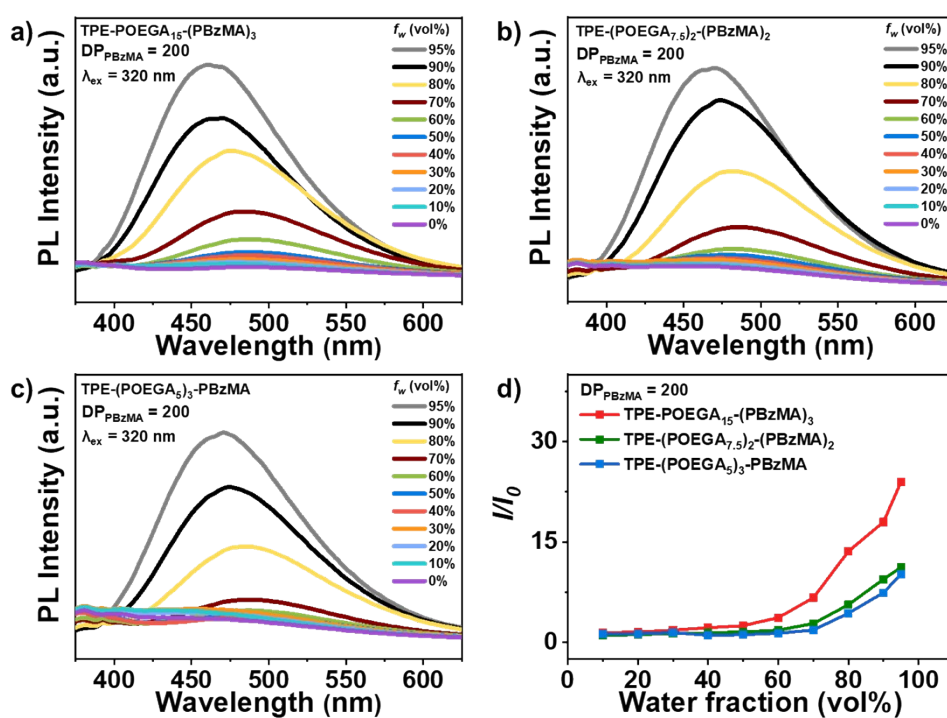

**Fig. S10** Fluorescence spectra of (a) TPE-POEGA<sub>15</sub>-(PBzMA)<sub>66</sub>)<sub>3</sub>, (b) TPE-(POEGA<sub>7.5</sub>)<sub>2</sub>-(PBzMA<sub>100</sub>)<sub>2</sub>, and (c) TPE-(POEGA<sub>5</sub>)<sub>3</sub>-PBzMA<sub>200</sub> in THF/H<sub>2</sub>O mixture with different volume fraction of H<sub>2</sub>O. (d) Plots of  $I/I_0$  versus the volume fraction of water ( $f_w$ ). [TPE] = 20  $\mu$ M; excitation wavelength = 320 nm;  $I_0$ : PL intensity of the polymer in pure THF.

**Scheme S1** Schematic illustration of the three stereoisomers of TPE-(POEGA<sub>7.5</sub>)<sub>2</sub>-(PBzMA)<sub>2</sub>.

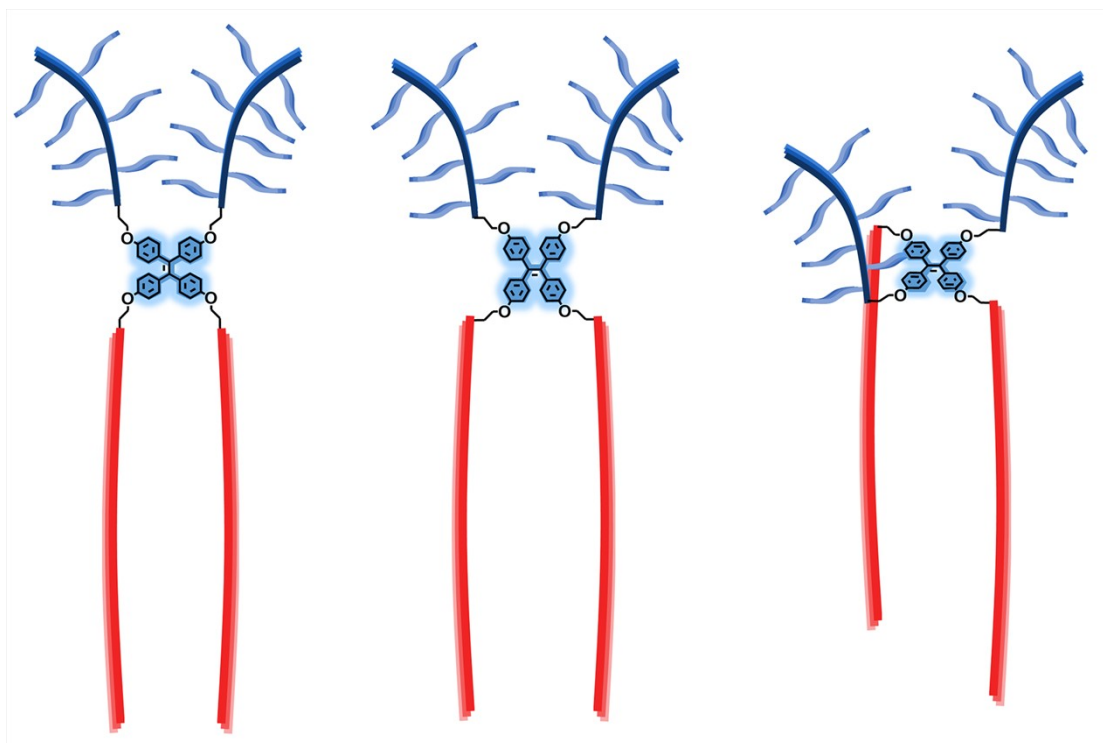

Supplement: d5py01012h1.pdf [file d5py01012h1.pdf]
